# Supplementary material for: Citrullus colocynthis Linn. Fruit extract ameliorates cisplatin-induced hepato-renal toxicity in rats
Source: publisher site journal article supplement (doi:10.1515/jcim-2017-0086), 2017-12-13
Supplement: Supplementary file 1 [file Supplementary_materials_CC.doc]

**Supplementary materials**

**Table 1. Effects of *CC*** on liver and kidney weight (g)

|  | Vehicle | Vehicle + CP | CC 100 mg/kg | CC 200 mg/kg | CC 400 mg/kg |
| --- | --- | --- | --- | --- | --- |
| Liver | 4.50±0.43 | 4.95±0.21 | 4.99±0.21 | 4.23±0.31* | 4.52±0.18 |
| Kidney | 0.82 ±0.03 | 0.87±0.02 | 0.90±0.05 | 0.77 ±0.03* | 0.88±0.04 |

Values are expressed as mean±SEM (n=6), *P<0.05 versus vehicle-cisplatin treated. Statistical level of significance analysis by one way ANOVA followed Turkey *post hoc* multiple comparison test.
